# Supplementary material for: Design of robust superamphiphobic surfaces with enlarged area fractions: the considerable role of Laplace pressure in dynamics of contact lines
Source: Royal Society of Chemistry journal article supplement (doi:10.1039/d2cp00606e), 2022-01-01
Supplement: d2cp00606e1.pdf [file d2cp00606e1.pdf]

## Supporting Information

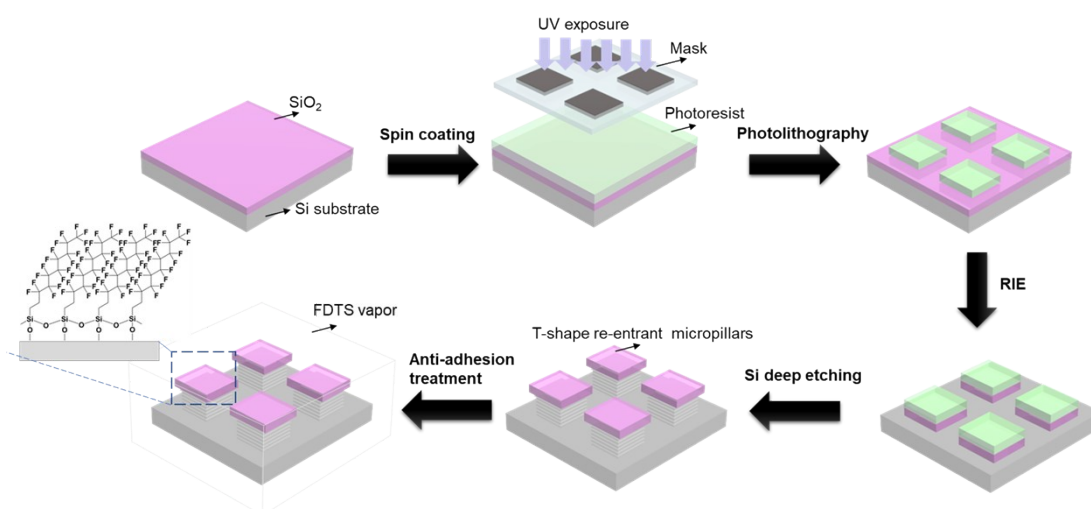

**Fig. S1** Illustration of fabrication process. Schematic images of the fabrication process of the T-shape overhang microcolumns featured with two parts of re-entrant curvatures for better stabilization of Cassie state, including the SiO<sub>2</sub> cap segment and the re-entrant Si pillar segment.

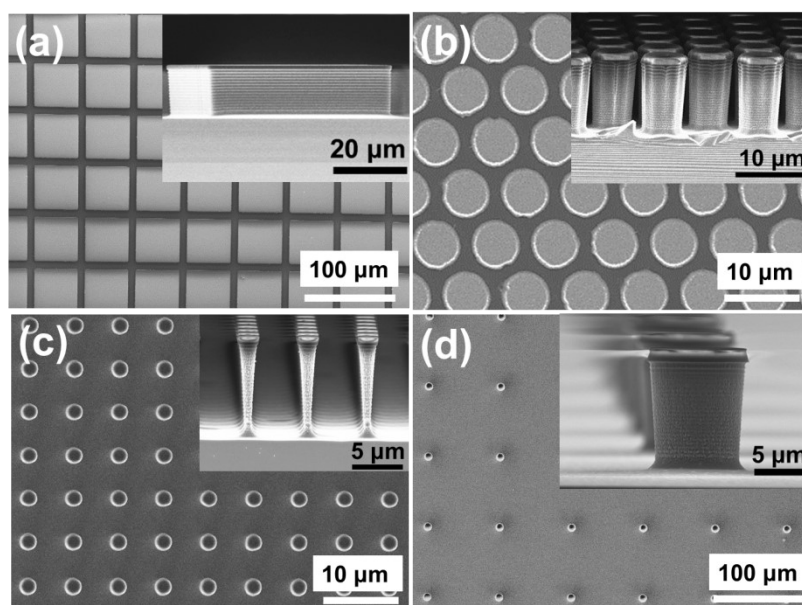

**Fig. S2** SEM images of overhang columns with different shapes and areas fractions. (a) Square columns with  $f = 69.4\%$ ,  $l = 50 \mu\text{m}$  and  $d = 10 \mu\text{m}$  and circular columns with various area fraction of (b) 53.6%, (c) 10.5% and (d) 1.2%. The insets are the corresponding cross-sectional SEM images.

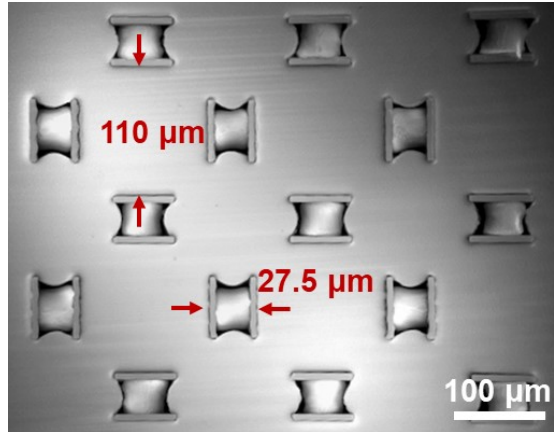

**Fig. S3** The microscope image of the water droplets after disturbance on a designed bi-parallel-channel re-entrant surface with different channel width (110  $\mu\text{m}$  and 27.5  $\mu\text{m}$ ). The liquid surface with larger intervals (110  $\mu\text{m}$ ) collapsed and turned into fully wetted Wenzel state, while the sections with smaller intervals (27.5  $\mu\text{m}$ ) providing a larger upward Laplace force still maintain air bubbles trapped in the channels.

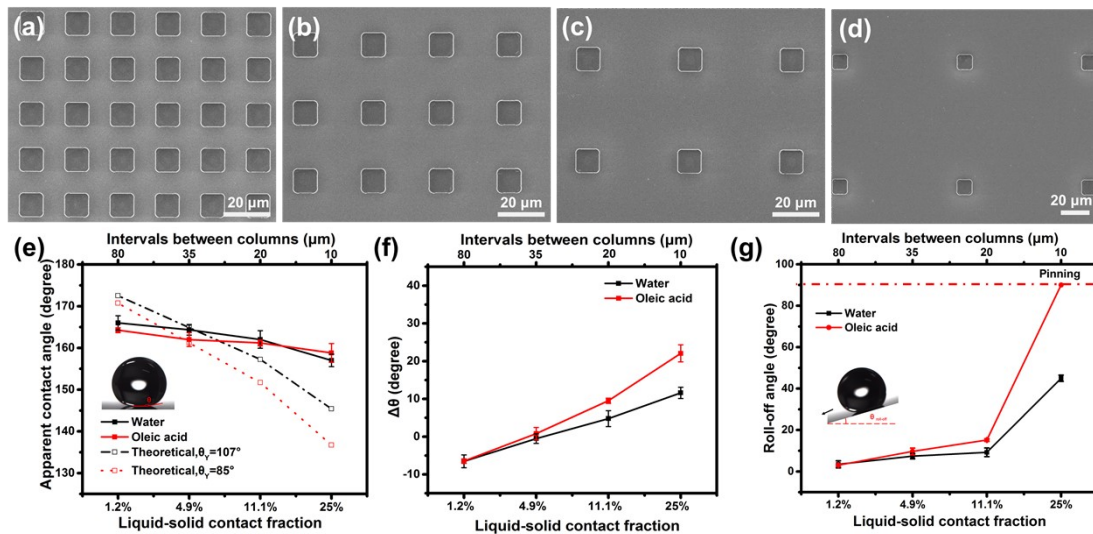

**Fig. S4** Effects of channel intervals and area fractions on contact angles and roll-off angles. SEM images of overhang square columns with  $l = 10 \mu\text{m}$  and various area fractions of (a) 25% ( $d = 10 \mu\text{m}$ ), (b) 11.1% ( $d = 30 \mu\text{m}$ ), (c) 4.9% ( $d = 45 \mu\text{m}$ ) and (d) 1.2% ( $d = 80 \mu\text{m}$ ). (e) Actual ( $\theta_{actual}$ ) and Cassie's theoretical ( $\theta_{Cassie}$ ) apparent contact angles, (f) differences between  $\theta_{actual}$  and  $\theta_{Cassie}$  and (g) roll-off angles of water and oleic acid droplet on the overhang square columns with  $l = 10 \mu\text{m}$  and various intervals of 10  $\mu\text{m}$  ( $f = 25\%$ ), 30  $\mu\text{m}$  ( $f = 11.1\%$ ), 45  $\mu\text{m}$  ( $f = 4.9\%$ ) and 80  $\mu\text{m}$  ( $f = 1.2\%$ ).

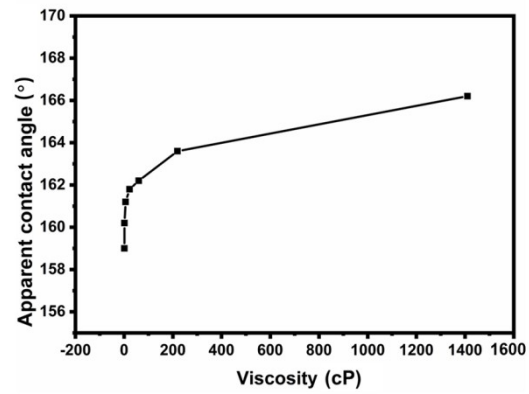

**Fig. S5** Effects of viscosity on contact angles. Apparent contact angles of various liquid droplets with similar surface energy and different viscosity on the super-amphiphobic surface with square columns ( $d = 10 \mu\text{m}$  and  $l = 10 \mu\text{m}$ ).
